# Supplementary material for: A 3D-QSAR Study on the Antitrypanosomal and Cytotoxic Activities of Steroid Alkaloids by Comparative Molecular Field Analysis
Source: PubMed Central journal article supplement (PMC6100617; doi:10.3390/molecules23051113), 2018-05-08
Supplement: molecules-23-01113-s001.pdf [file molecules-23-01113-s001.pdf]

*Supplementary Material*

# **A 3D-QSAR study on the antritypanosomal and cytotoxic activities of steroid alkaloids by comparative molecular field analysis**

**Charles O. Nnadi,<sup>1,2</sup> Julia B. Althaus,<sup>1</sup> Ngozi J. Nwodo,<sup>2</sup> Thomas J. Schmidt<sup>1,\*</sup>**

<sup>1</sup> Institute of Pharmaceutical Biology and Phytochemistry (IPBP), University of Münster, PharmaCampus Corrensstraße 48, D-48149, Münster, Germany; E-mail: [charles.nnadi@unn.edu.ng](mailto:charles.nnadi@unn.edu.ng)

<sup>2</sup> Department of Pharmaceutical and Medicinal Chemistry, Faculty of Pharmaceutical Sciences, University of Nigeria Nsukka, 410001 Enugu State Nigeria; E-mail: [ngozi.nwodo@unn.edu.ng](mailto:ngozi.nwodo@unn.edu.ng)

\* Correspondence: [thomschm@uni-muenster.de](mailto:thomschm@uni-muenster.de); Tel.: +49-251-83-33378

**Table S1.** Statistical detaily of 3D QSAR CoMFA model for trypanocidal (*Tbr*) activity

| Model statistics/ <i>N</i> | 1           | 2           | 3                  | 4           | 5           |
|----------------------------|-------------|-------------|--------------------|-------------|-------------|
| R <sup>2</sup>             | 0.717       | 0.920       | <b>0.995</b>       | 0.997       | 0.999       |
| SDEC                       | 0.405       | 0.216       | <b>0.056</b>       | 0.043       | 0.028       |
| <i>F</i> -values           | 25.336      | 51.473      | <b>482.639</b>     | 539.039     | 917.456     |
| Q <sup>2</sup> (SDEP)      | 0.42 (0.58) | 0.67 (0.44) | <b>0.83 (0.33)</b> | 0.82 (0.32) | 0.84 (0.30) |
| P <sup>2</sup> (SDEP)      | 0.48 (0.67) | 0.69 (0.51) | <b>0.79 (0.51)</b> | 0.68 (0.52) | 0.69 (0.51) |

Q<sup>2</sup> = coefficient of determination for leave-one-out cross-validation; *N* = number of statistical components; R<sup>2</sup> = coefficient of determination for non-cross validated model data; SDEC = standard deviation error in calculation; SDEP = standard deviation error in prediction; *F* = Fisher value; P<sup>2</sup> = coefficient of dermination for the test set predictions.

**Table S2.** Statistical details of 3D QSAR CoMFA model for cytotoxic (L6) activity

| Model statistics/ <i>N</i> | 1           | 2                  | 3           | 4           | 5           |
|----------------------------|-------------|--------------------|-------------|-------------|-------------|
| R <sup>2</sup>             | 0.829       | <b>0.940</b>       | 0.981       | 0.994       | 0.998       |
| SDEC                       | 0.187       | <b>0.111</b>       | 0.063       | 0.034       | 0.019       |
| <i>F</i> -values           | 48.562      | <b>70.452</b>      | 134.159     | 302.887     | 693.318     |
| Q <sup>2</sup> (SDEP)      | 0.46 (0.33) | <b>0.64 (0.28)</b> | 0.67 (0.26) | 0.70 (0.25) | 0.72 (0.24) |
| P <sup>2</sup> (SDEP)      | 0.44 (0.49) | <b>0.59 (0.42)</b> | 0.74 (0.33) | 0.78 (0.30) | 0.81 (0.28) |

Q<sup>2</sup> = coefficient of determination for leave-one-out cross-validation; *N* = number of statistical components; R<sup>2</sup> = coefficient of determination for non-cross validated model data; SDEC = standard deviation error in calculation; SDEP = standard deviation error in prediction; *F* = Fisher value; P<sup>2</sup> = coefficient of dermination for the test set predictions.

**Table S3.** Actual vs predicted pIC<sub>50</sub> for anti-*Tbr* and L6 cytotoxic activity

| Compounds | pIC <sub>50</sub> ( <i>Tbr</i> ), 3PC |           | pIC <sub>50</sub> (L6), 2PC |           |
|-----------|---------------------------------------|-----------|-----------------------------|-----------|
|           | Actual                                | Predicted | Actual                      | Predicted |
| 1         | 6.3958                                | 6.0267    | 5.2928                      | 4.7213    |
| 2         | 5.3159                                | 5.9046    | 4.8135                      | 4.8189    |
| 3         | 7.1249*                               | 6.4687    | 5.6057*                     | 4.9596    |
| 4         | 6.4320                                | 6.0267    | 4.7993*                     | 4.7511    |
| 5         | 6.1726*                               | 6.4385    | 4.7707                      | 4.9136    |
| 6         | 5.9190                                | 6.1137    | 4.7603                      | 4.7833    |
| 7         | 4.8282*                               | 5.3394    | n.t                         | n.p       |
| 8         | 5.0624                                | 4.9017    | 4.1816                      | 4.1339    |
| 9         | 4.7568                                | 5.2974    | 3.8897                      | 4.1848    |
| 10        | 5.1326*                               | 5.3685    | 4.3800*                     | 4.1369    |
| 11        | 6.7781                                | 6.3490    | 4.2972                      | 4.3223    |
| 12        | 6.7781*                               | 6.0757    | 4.5618                      | 4.3017    |
| 13        | 6.3778                                | 6.2482    | 4.2130                      | 4.1438    |
| 14        | 6.9245                                | 6.7948    | 4.8444                      | 4.5317    |
| 15        | 5.7807                                | 5.5249    | 4.0103*                     | 4.4999    |
| 16        | 5.0856                                | 5.1469    | 3.7426                      | 4.3146    |
| 17        | 4.6798                                | 5.0961    | 3.9045                      | 4.0640    |
| 18        | 5.4342*                               | 6.1487    | 4.7233*                     | 4.4447    |
| 19        | 6.7905*                               | 6.4609    | 4.5047*                     | 4.8203    |

\*Test set compounds; pIC<sub>50</sub> = -log(IC<sub>50</sub>) for CoMFA analysis; n.t = not tested; n.p = not predicted

**Table S4.**  $^1\text{H}$  and  $^{13}\text{C}$  NMR Data of cyclovirobuxein B (600 and 150 MHz, respectively,  $\text{CDCl}_3$ ), Data are from [17].

| Position | $\delta(\text{ppm})$ | $^1\text{H}$ -NMR |                  | $^{13}\text{C}$ NMR<br>$\delta$ (ppm) |
|----------|----------------------|-------------------|------------------|---------------------------------------|
|          |                      | mult.             | J (Hz)           |                                       |
| 1        | 1,52                 | *(2H)             |                  | 31,17                                 |
| 2        | 1,75                 | *                 |                  | 20,02                                 |
|          | 1,53                 | *                 |                  |                                       |
| 3        | 2,06                 | dd                | 3,2; 11,7        | 71,40                                 |
| 4        |                      |                   |                  | 41,62                                 |
| 5        | 1,85                 | dd                | 5,49; 14,86      | 48,78                                 |
| 6        | 5,62                 | ddd [dt]          | 1,2; 1,2; 10,6   | 127,70                                |
| 7        | 5,40                 | ddd               | 3,25; 6,1; 10,6  | 128,38                                |
| 8        | 2,53                 | dd                | 2,0; 6,0         | 43,39                                 |
| 9        |                      |                   |                  | 20,94                                 |
| 10       |                      |                   |                  | 28,87                                 |
| 11       | 1,82                 | dd                | 5,5; 14,9        | 24,98                                 |
|          | 1,41                 | ddd               | 1,57; 4,8; 14,97 |                                       |
| 12       | 1,69                 | ddd               | 5; 13,4          | 32,10                                 |
|          | 1,37                 | ddd               | 1,5; 5,4 13      |                                       |
| 13       |                      |                   |                  | 45,56                                 |
| 14       |                      |                   |                  | 49,86                                 |
| 15       | 1,98                 | dd                | 10; 13,4         | 41,75                                 |
|          | 1,26                 | dd                | 13,4; 2,1        |                                       |
| 16       | 4,15                 | ddd               | 2,1; 7,8; 9,6    | 78,89                                 |
| 17       | 1,58                 | dd                | 6,7; 10,5        | 61,59                                 |
| 18       | 0,91                 | s (3H)            |                  | 15,71                                 |
| 19       | 0,72                 | d                 | 4,1              | 18,37**                               |
|          | -0,21                | d                 | 4,1              |                                       |
| 20       | 2,49                 | dq                | 10,4; 6,1        | 59,15                                 |
| 21       | 1,09                 | d(3H)             | 6,1              | 18,90                                 |
| 28       | 0,94                 | s(3H)             |                  | 18,35**                               |
| 29       | 1,05                 | s(3H)             |                  | 26,17                                 |
| 30       | 0,79                 | s(3H)             |                  | 16,68                                 |
| 31/32    | 2,29                 | s(6H)             |                  | 44,31                                 |
| 33       | 2,44                 | s(3H)             |                  | 33,89                                 |

\*chemical shift values extracted from HSQC spectrum due to signal overlap; \*\*signals of C-19 and C-18 assigned with the help of an APT spectrum.

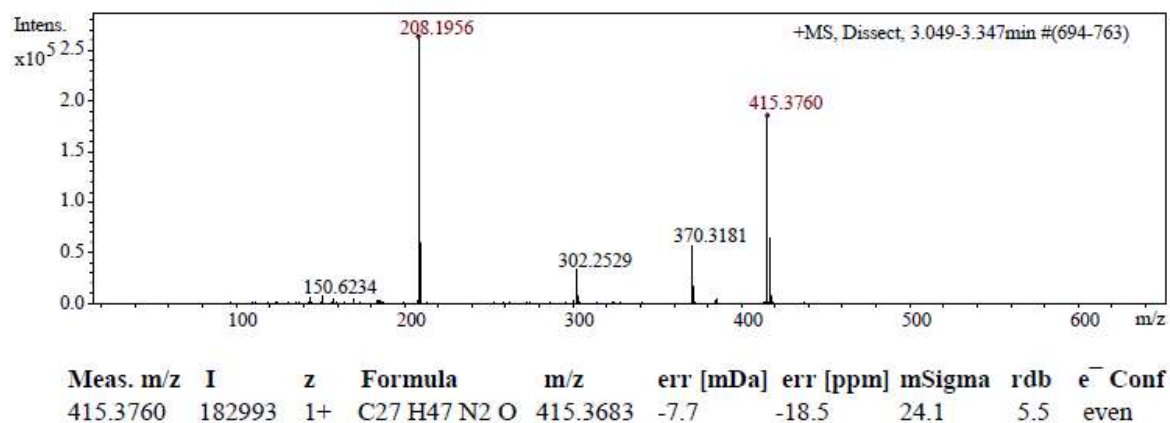

Figure S1. +ESI QqTOF mass spectrum of cycloviobuxein B (19)

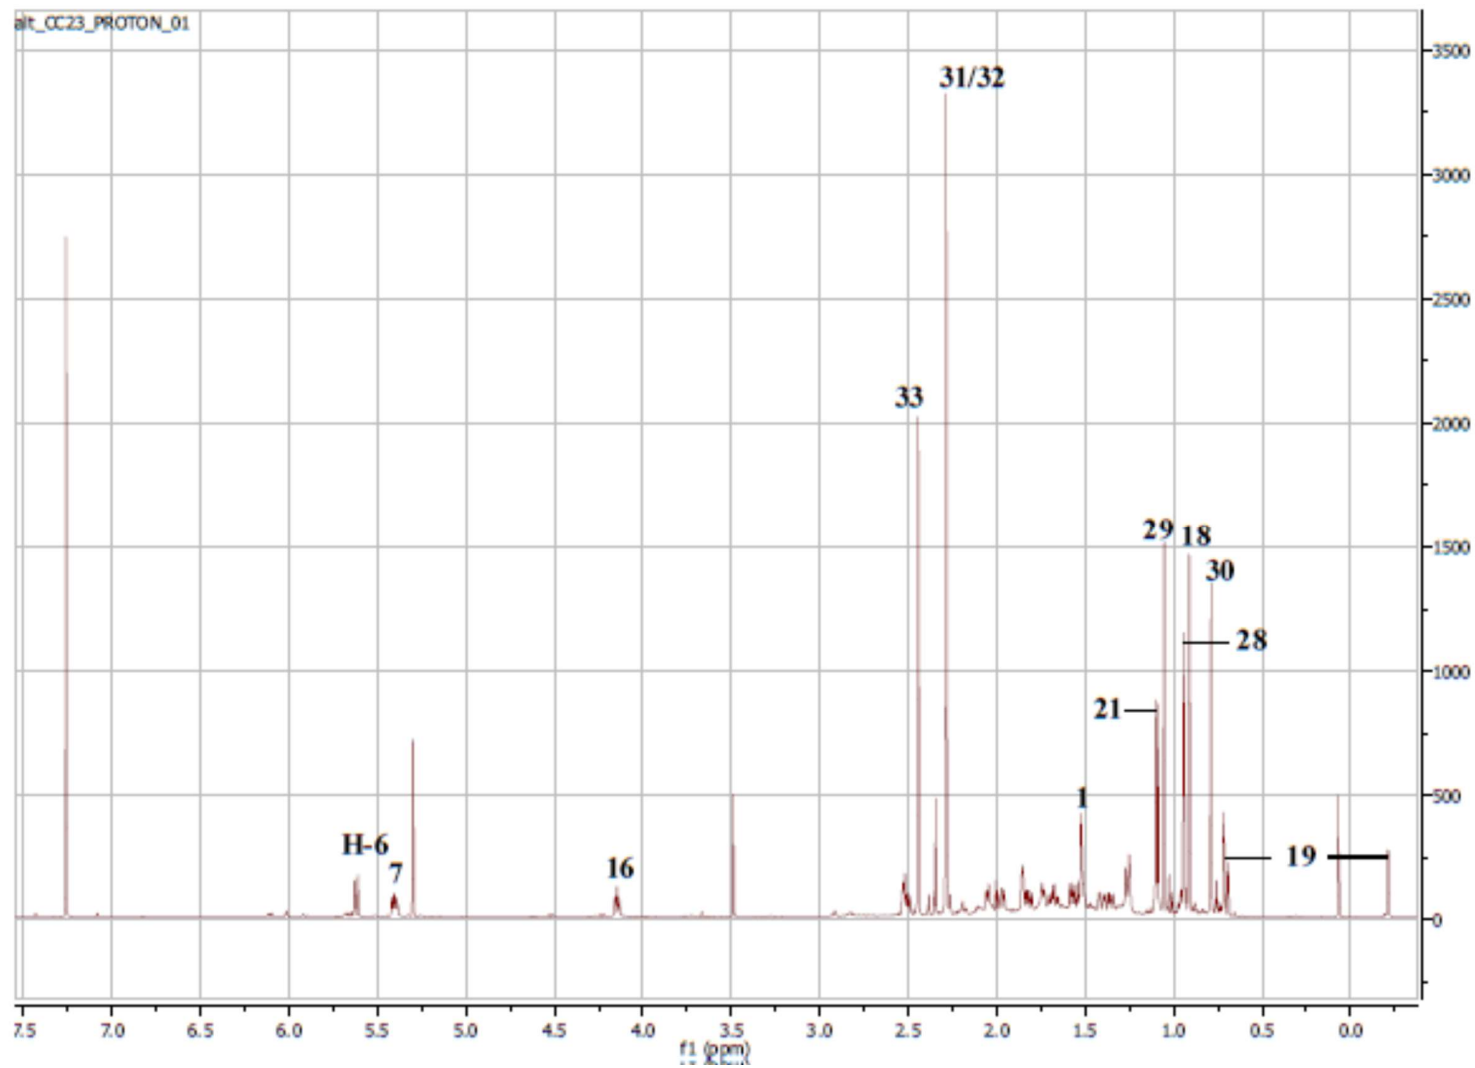

Figure S2. <sup>1</sup>H NMR spectrum (600 MHz, CDCl<sub>3</sub>) of cyclovirobuxein B (19)

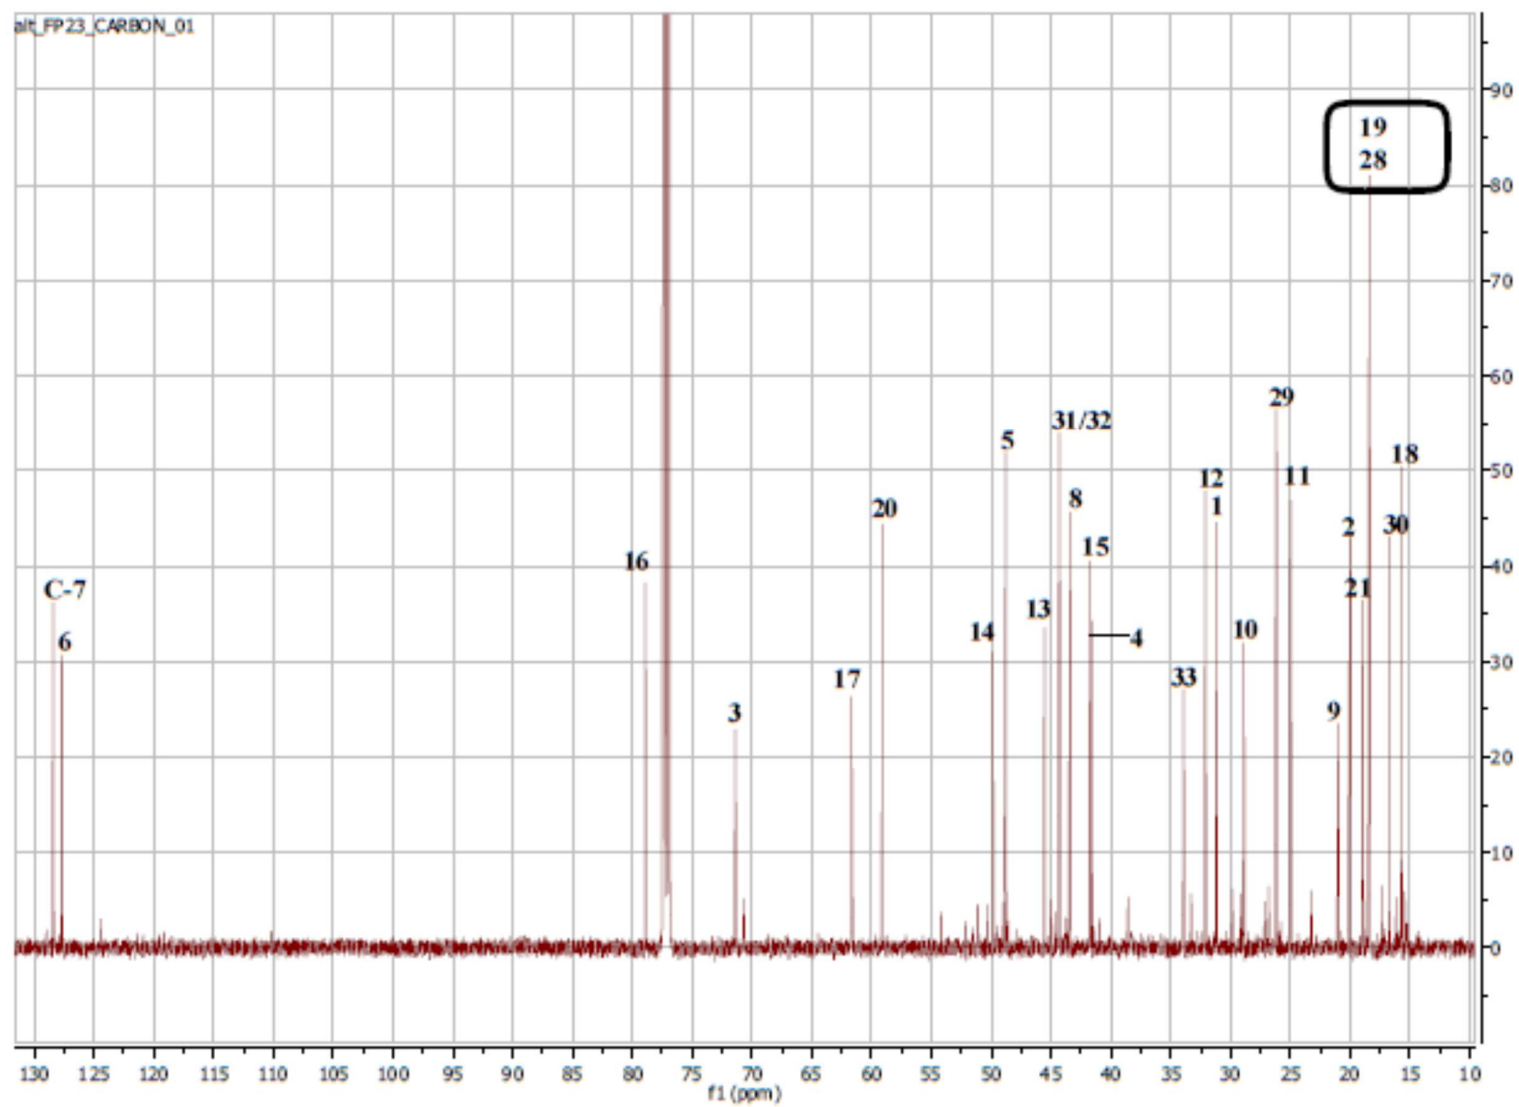

Figure S3.  $^{13}\text{C}$  NMR spectrum (150 MHz,  $\text{CDCl}_3$ ) of cyclovirobuxein B (19)

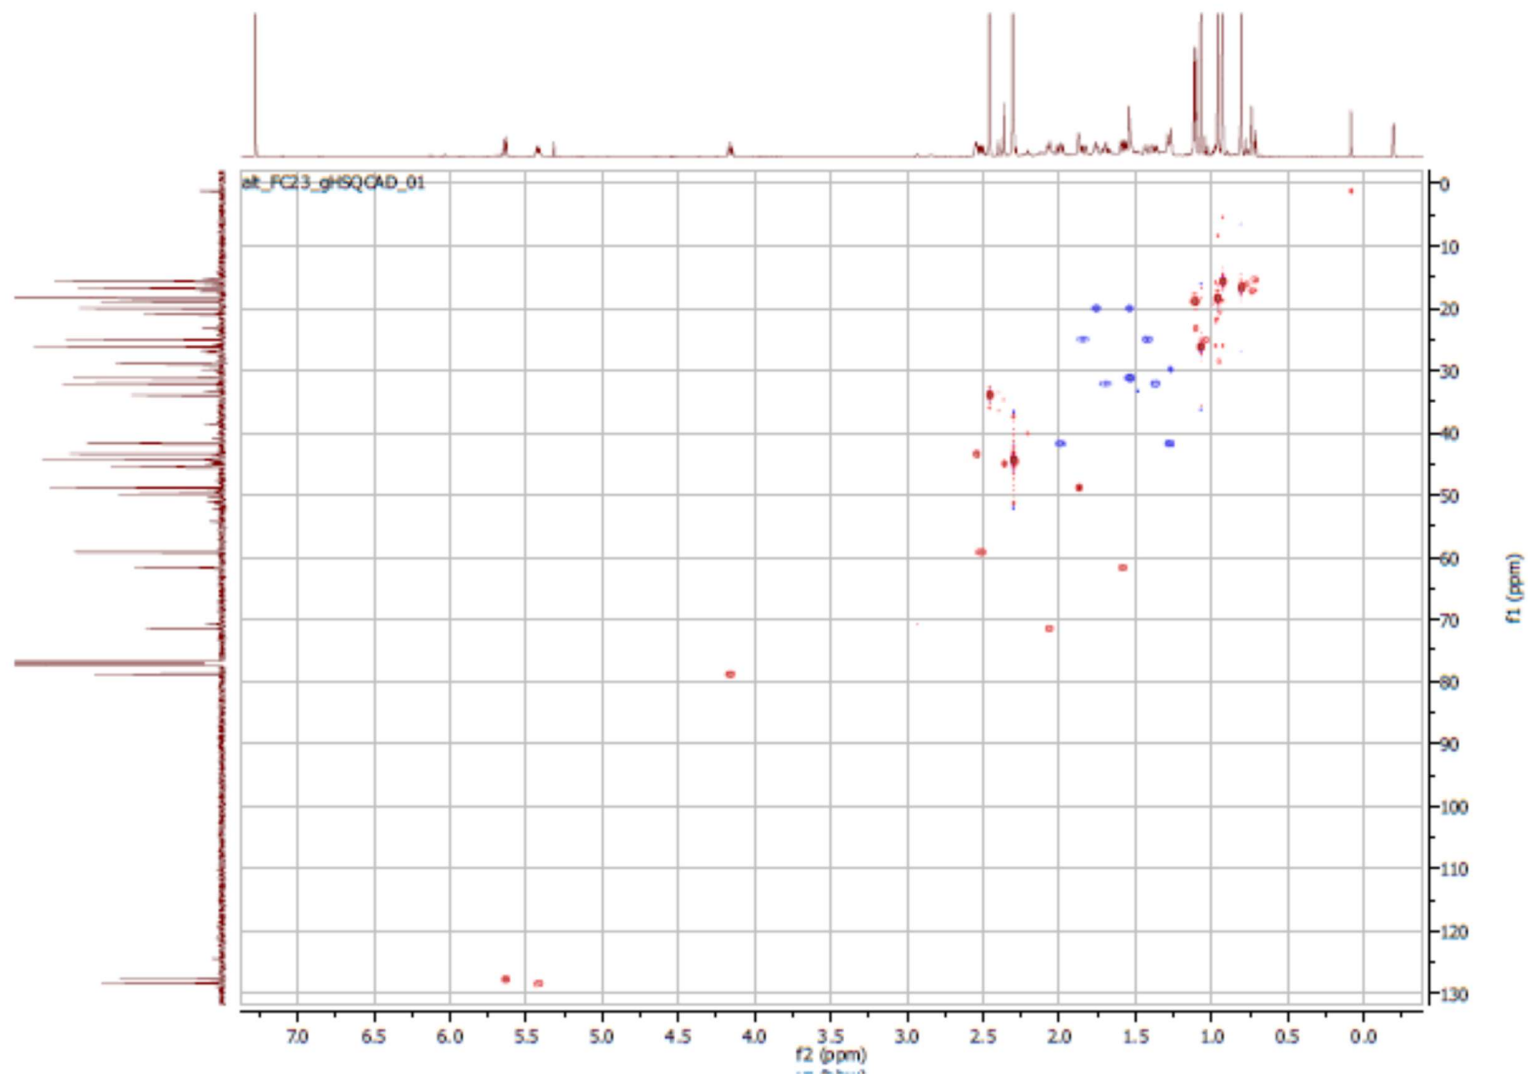

**Figure S4.**  $^1\text{H}/^{13}\text{C}$  HSQC spectrum (600 MHz,  $\text{CDCl}_3$ ) of cyclovirobuxein B (**19**)



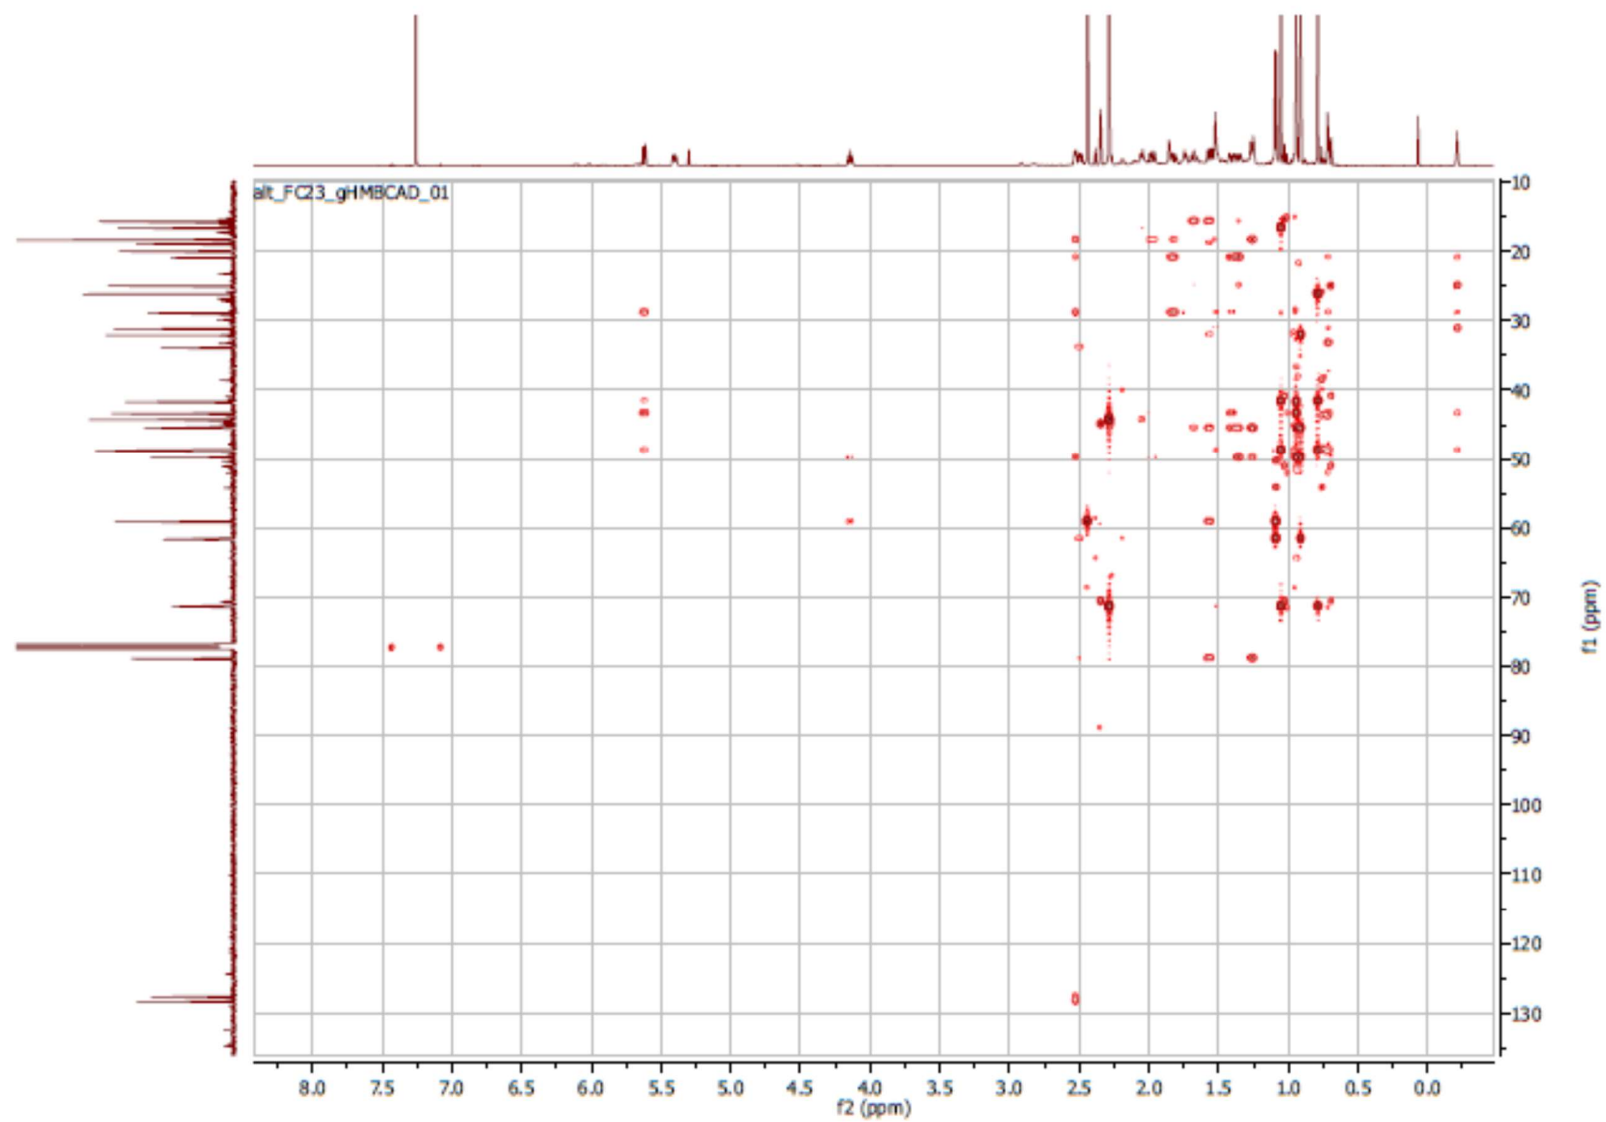

Figure S5.  $^1\text{H}/^{13}\text{C}$  HMBC spectrum (600 MHz,  $\text{CDCl}_3$ ) of cyclovirobuxein B (19)
